# Supplementary material for: Dissecting Mechanisms of Ligand Binding and Conformational Changes in the Glutamine-Binding Protein
Source: eLife journal article supplement (doi:10.7554/elife.95304), 2024-03-25

Figure 2-source data 1. PDF file containing SDS page gel for Figure 2A, indicating the relevant bands and treatments.

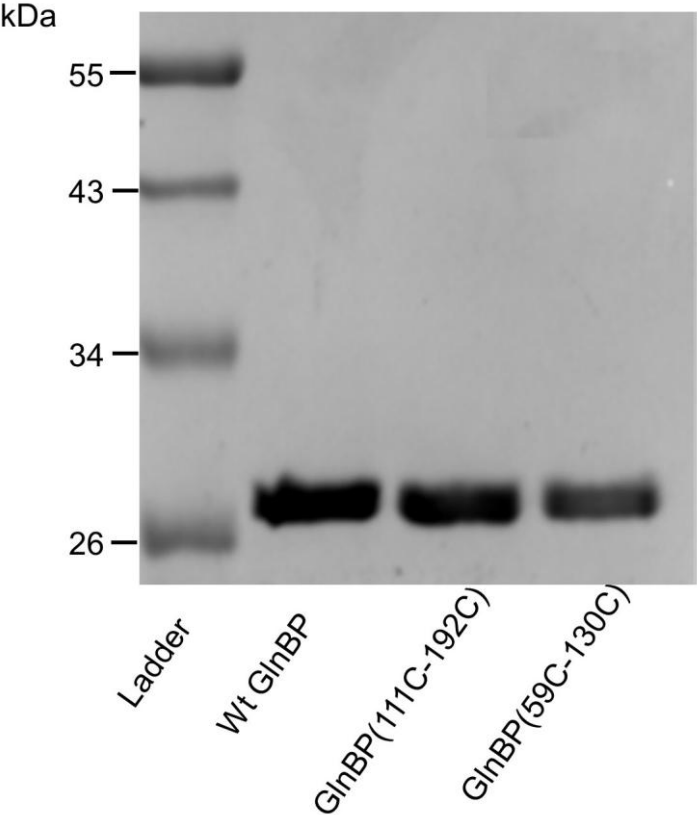

Supplement: fig2-data1 [file elife-95304-fig2-data1-v1.pdf]
